# Supplementary material
Source: PubMed Central journal article supplement (PMC2829164)
Supplement: emboj2009391s1.pdf [file emboj2009391s1.pdf]

### Supplementary Table I

Gene ontology term finder results for genes up- and down-regulated

| Change                     | # genes changed/<br>analysed | GO class                   | p         | # genes changed/<br>analysed | GO class               | p        |
|----------------------------|------------------------------|----------------------------|-----------|------------------------------|------------------------|----------|
|                            | <b>30 min</b>                |                            |           | <b>120 min</b>               |                        |          |
| <b>UP</b><br>( >2 x )      | 244/4965                     | Carbohydrate<br>metabolism | 1.60E-11  | 465/5268                     | Transposition          | 6.20E-12 |
|                            |                              |                            |           |                              | Response to<br>toxin   | 4.90E-04 |
| <b>DOWN</b><br>( < 0.5 x ) | 261/4965                     | Ribosome<br>biogenesis     | 2.30E-118 | 339/5268                     | Ribosome<br>biogenesis | 6.20E-32 |
|                            |                              | Gene<br>expression         | 5.35E-21  |                              | Gene<br>expression     | 1.50E-22 |

### Supplementary Table II

Selected genes for validation of microarray data by qRT-PCR

| Chromosome | Systematic<br>name | Gene<br>name | Distance<br>from<br>telomere (bp) | primer-direct            | primer-reverse         |
|------------|--------------------|--------------|-----------------------------------|--------------------------|------------------------|
| III        | YCL009C            | ILV6         | 105583                            | TGCACAGACACGCAACAAGAC    | AGGCGCTGGTGTTCGTAAT    |
| III        | YCL018W            | LEU2         | 92370                             | AAGCCTCCGTTATCCCAGGT     | CGTGGCATGGTTCGTACAAAC  |
| III        | YCL059C            | KRR1         | 23404                             | CAACGCTTGTAGGCCCTAACG    | GGACCCATGGCACTTACTGTGT |
| III        | YCR053W            | THR4         | 99125                             | AGAAGGTCAAGTTCGTTGTGCC   | AGCGATGGCCAGTTTTTCAA   |
| IV         | YDL044C            | MTF2         | 374625                            | TCGCTACTTGAGACGTGTGG     | TGAGCTGTCTCCTGCTTCA    |
| IV         | YDL215C            | GDH2         | 72280                             | AATTCTGGACGGTTCAGGTG     | GGAAGTGTGAAATCGGAAA    |
| XII        | YLL041C            | SDH2         | 54030                             | AGGAAGGCCTTTTGTGGT       | GGTTTAGCACTTGGCTCGTC   |
| XII        | YLL055W            | YTC1         | 31407                             | GGTGTCCATTATTGCGATGG     | TAACAAAATGGCTGGTGCAA   |
| XII        | YLR249W            | YEF3         | 439439                            | GCAACACGCTTTTGCTCATA     | AGCTTCAGCATCGTTTTCGT   |
| XII        | YLR438W            | CAR2         | 64654                             | CGCAGACTACTTCCCAAAGG     | GCCTCTGCCTTGTAGTGGTC   |
| XII        | YLR129W            | DIP2         | 676214.5                          | CCCTGCTCCTCTCAAGACAC     | CAATGAACCATTGGATGCTG   |
| XII        | YLR446W            | -            | 51928                             | TGATTTTACCCGCTGATTCC     | GTTCCATCGCGATCGTTTTAT  |
| XIII       | YML130C            | ERO1         | 12830                             | ACGCCAACGATGGTCTGTG      | ACTACCCAAGATCTCAGGCTGC |
| XIII       | YMR116C            | ASC1         | 424075                            | TCACAGTCACATTGTCCAAGACTG | CGGTGGCAACATCCCATAAT   |
| XIV        | YNL330C            | RPD3         | 19152                             | ATCTGGTGGTGGCTCTATGG     | ACCCAGAAGCTTCCGATTTT   |
| XIV        | YNL016W            | PUB1         | 603586.5                          | TCCATTTCAGGCAGAAAC       | ACCGGTTGTTGTTGGTCATT   |
| XV         | YOL012C            | HTZ1         | 304281                            | AATCCGGCGCTAAAGACAGTG    | CGTGCCTTTTCAGGTAACGCT  |
| XV         | YOL151W            | GRE2         | 44706                             | CATCTTGCGAACTCGTCAACAG   | TGAGCCTTTGCAACATCACG   |
| XVI        | YPL026C            | SKS1         | 501427                            | AGGGACCTTTTCACCTCGAT     | CAGTGATCTAATGCGGAGCA   |
| XVI        | YPL274W            | SAM3         | 23819.5                           | CAGAGCTTTCCTGCCAATTC     | CGCTTGAAAAGAAATCAGC    |
